# Supplementary material
Source: Elsevier journal article supplement (https://www.sciencedirect.com/science/article/pii/S1888989121000628)
Supplement: mmc1 [file S1888989121000628:mmc1.doc]

**Appendix**

*Supplementary Table 1. Sampling strategy across health and care facilities in the main study locations (Andalucía, Madrid, and Murcia)*

| Region | Recruitment unit | Type of unit | Sampling strategy |
| --- | --- | --- | --- |
| All | Sociedad Española de Medicina Preventiva, Salud Pública e Higiene (SEMPSPH) | Medical association | Representativeness approached by researcher; snowball sampling (text messages, emails) |
| All | Asociación Nacional de Psicólogos y Residentes (ANPIR) | Psychological association | Representativeness approached by researcher; snowball sampling (text messages, emails) |
| Cádiz | Hospital Universitario Puerto Real | General hospital | Representativeness approached by researcher |
| Granada | Hospital Regional Clínico Universitario San Cecilio | General hospital | Representativeness approached by researcher |
| Granada | Unidad de Gestión Clínica Almanjayar | Outpatient specialty center | Representativeness approached by researcher |
| Granada | Unidad de Gestión Clínica Cartuja | Outpatient specialty center | Representativeness approached by researcher |
| Granada | Unidad de Gestión Clínica Gran Capitán | Outpatient specialty center | Representativeness approached by researcher |
| Huelva | Hospital Juan Ramón Jiménez | General hospital | Representativeness approached by researcher |
| Madrid | Colmenar Viejo Sur | Outpatient specialty center | Snowball sampling (text messages); billboard |
| Madrid | Hospital Universitario La Paz | General hospital | Pop-up alert embedded in electronic system; snowball sampling (text messages); billboard |
| Madrid | Oficina Regional de Salud Mental | Outpatient specialty center | Representativeness approached by researcher |
| Madrid | Hospital Universitario La Princesa | General hospital | Snowball sampling (text messages) |
| Madrid | Unión General de Trabajadores (UGT) | Labor union | Representativeness approached by researcher |
| Madrid | Comisiones Obreras (CCOO) | Labor union | Representativeness approached by researcher |
| Madrid | Sindicato de Enfermería (SATSE) | Labor union | Representativeness approached by researcher |
| Madrid | Asocación de Médicos y Titulados Superiores (AMYTS) | Labor union | Representativeness approached by researcher |
| Málaga | Unión General de Trabajadores (UGT) | Labor union | Representativeness approached by researcher |
| Málaga | Hospital Regional Universitario de Málaga | General hospital | Snowball sampling (text messages) |
| Málaga | Central Sindical Independiente y de Funcionarios (CSIF) | Labor union | Representativeness approached by researcher |
| Málaga | Comisiones Obreras (CCOO) | Labor union | Representativeness approached by researcher |
| Málaga | Hospital Universitario Virgen de la Victoria | General hospital | Snowball sampling (text messages) |
| Málaga | Sindicato de Enfermería (SATSE) | Labor union | Representativeness approached by researcher |
| Málaga | Sindicato de Técnicos Auxiliares de Enfermería (SAE) | Labor union | Representativeness approached by researcher |
| Málaga | Local non-hospital emergency departments (Málaga-Guadalhorce) | Non-hospital emergency department | Representativeness approached by researcher; snowball sampling (text messages, emails) |
| Málaga | Hospital Comarcal de la Axarquía | General hospital | Representativeness approached by researcher |
| Málaga | Hospital Comarcal Antequera | General hospital | Representativeness approached by researcher |
| Málaga | Medical Residents Coordination Office | Professional network | Representativeness approached by researcher |
| Málaga | Hospital San Juan de Dios | Private hospital | Representativeness approached by researcher |
| Málaga | Local health office (Norte de Málaga-Antequera) | Primary care center | Representativeness approached by researcher |
| Málaga | Local health office (Serranía de Málaga) | Primary care center | Representativeness approached by researcher |
| Málaga | Local health office (Este de Málaga-Axarquia) | Primary care center | Representativeness approached by researcher |
| Murcia | Hospital Clínico Universitario Virgen de la Arrixaca | General hospital | Representativeness approached by researcher; snowball sampling (text messages, emails) |
| Murcia | Hospital Los Arcos | General hospital | Representativeness approached by researcher; snowball sampling (text messages, emails) |
| Murcia | Oficina Regional de Salud Mental | Outpatient specialty center | Representativeness approached by researcher |
| Murcia | Instituto Murciano de Investigación Biomédica (IMIB) | Health research institute | Representativeness approached by researcher; snowball sampling (text messages, emails) |
| Murcia | Colegio de Médicos | Medical association | Representativeness approached by researcher |
| Murcia | Colegio de Enfermería | Nursing association | Representativeness approached by researcher |
| Murcia | Colegio de Farmacia | Pharmaceutical association | Representativeness approached by researcher |
| Murcia | Colegio de Fisioterapia | Physiotherapeutical association | Representativeness approached by researcher |
| Murcia | Comite Empresa (Sindicato) | Labor union | Representativeness approached by researcher |
| Murcia | Primary care network | Professional network | Representativeness approached by researcher |
| Sevilla | Hospital Universitario Virgen de Valme | General hospital | Representativeness approached by researcher |
| Sevilla | Area de Gestión Sanitaria Sur de Sevilla | Primary care center | Representativeness approached by researcher |
